# Supplementary material for: Magnitude and Breadth of Antibody Cross-reactivity Induced by Recombinant Influenza Hemagglutinin Trimer Vaccine Is Enhanced by Combination Adjuvants
Source: Research Square preprint supplement (doi:10.21203/rs.3.rs-1104187/v1), 2021-12-13
Supplement: Supplementary file 1 [file a9f890ee1f923bf96507398b.docx]

**Supplementary Figures**

**Supplementary Figure S1. A)** Immunization and bleed schedule for mice in groups 1-18 (Table 1); **B)** Mouse body weights (mean +/- SD; N=4 per group) expressed as % of original body weight.

**
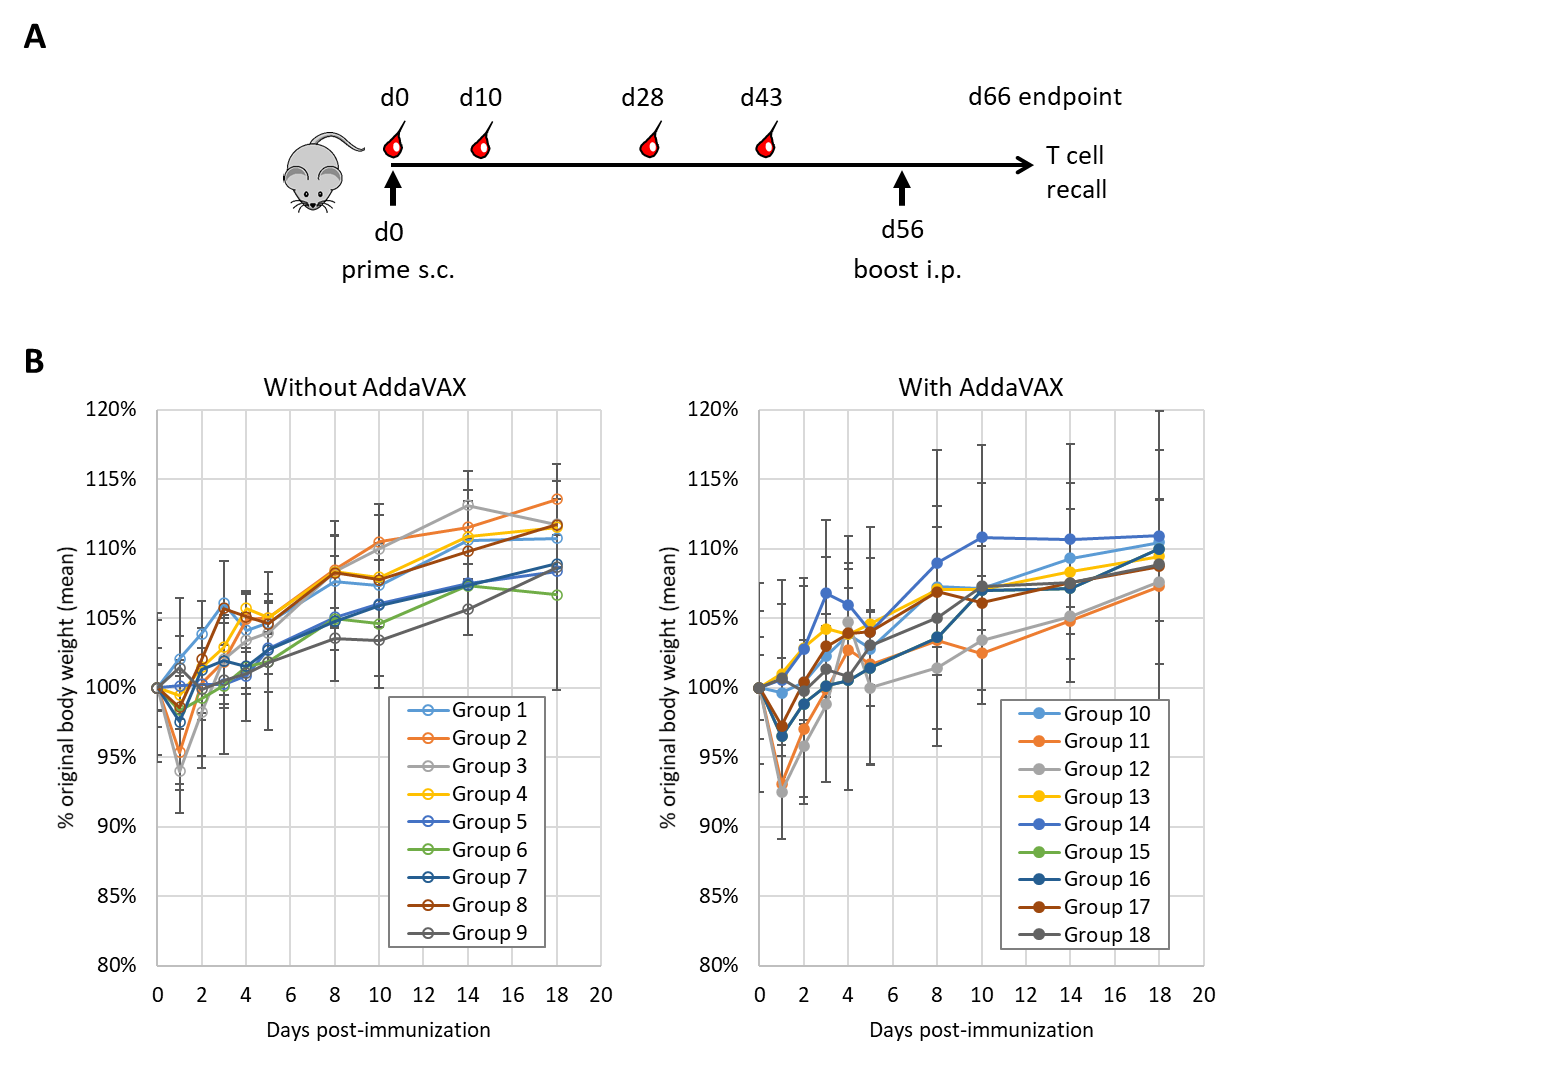
**

**Supplementary Figure S2.** Celltype model training and doublet detection. **A)** Confusion matrix of support vector machine training. The numbers in each element of the matrix indicates the fraction of cells with the correct label that were called in each predicted label category; **B)** Doublet detection scores generated by scrublet; **C)** and **D)** Expression of Cd3e and Cd79a in each cell type, respectively. The B/T cell doublet cluster is expressing both markers.

**Supplementary Figure S3.** Enhanced volcano plot comparison between all immunized and non-immunized cells after downsampling. IgG transcripts show large Log2 fold changes (FC) that are also statistically significant.

**
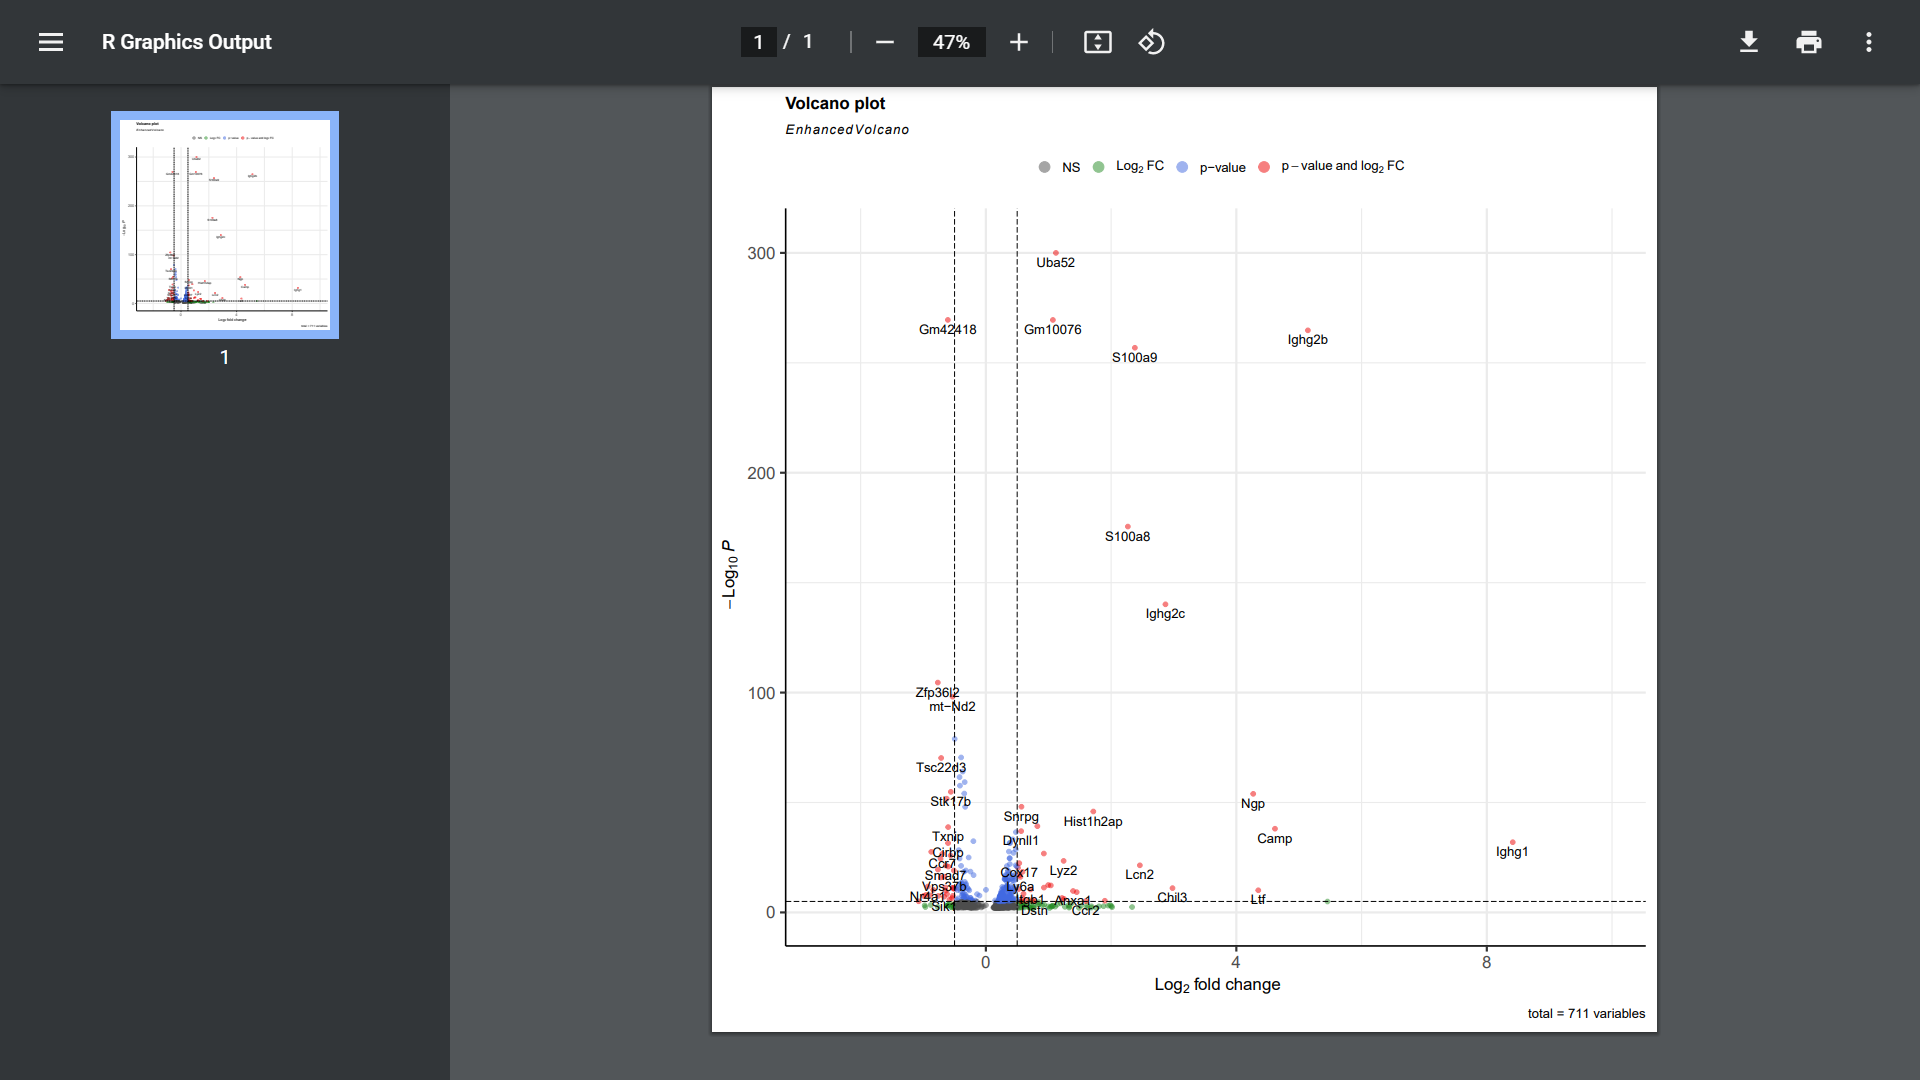
**
